# Supplementary material for: Ferroic phase transitions and magnetoelectric coupling in cobalt doped BaTiO3
Source: Royal Society of Chemistry journal article supplement (doi:10.1039/d1tc02961d), 2021-01-01
Supplement: d1tc02961d1.pdf [file d1tc02961d1.pdf]

## **Ferroic Phase Transitions and Magnetoelectric Coupling in Cobalt Doped BaTiO<sub>3</sub>**

Dhiren K. Pradhan<sup>a,b,\*</sup>, Hari Sankar Mohanty<sup>c,i</sup>, Shalini Kumari<sup>d,e</sup>, Krishnamayee Bhoi<sup>c</sup>, Nan Tang<sup>a</sup>, Ravikant<sup>f,j</sup>, M. M. Rahaman<sup>g</sup>, Dillip K. Pradhan<sup>c</sup>, Ashok Kumar<sup>f</sup>, Dustin A. Gilbert<sup>a,h</sup>, Philip D. Rack<sup>a,b,\*</sup>

<sup>a</sup> *Department of Materials Science & Engineering, University of Tennessee, Knoxville, Tennessee 37996, USA.*

<sup>b</sup> *Center for Nanophase Materials Sciences, Oak Ridge National Laboratory, Oak Ridge, Tennessee 37831, USA.*

<sup>c</sup> *Department of Physics & Astronomy, National Institute of Technology, Rourkela-769008, India.*

<sup>d</sup> *Department of Materials Science & Engineering, The Pennsylvania State University, University Park, Pennsylvania 16802, USA.*

<sup>e</sup> *Department of Physics, The Pennsylvania State University, University Park, Pennsylvania 16802, USA.*

<sup>f</sup> *National Physical Laboratory (CSIR), Dr. K. S. Krishnan Marg, New Delhi 110012, India.*

<sup>g</sup> *Departmental of Materials Science and Engineering, University of Rajshahi, Rajshahi 6205, Bangladesh.*

<sup>h</sup> *Department of Physics & Astronomy, University of Tennessee, Knoxville, Tennessee 37996, USA.*

<sup>i</sup> *Present address: Department of Basic Science and Humanities, GIET University, Gunupur, Odisha 765022, India.*

<sup>j</sup> *Present address: Department of Physics, Government College Sailana, Vikram University, Ujjain 457550, India.*

**Supplementary material S1: XPS Survey Spectrum of BTCO7 sample**

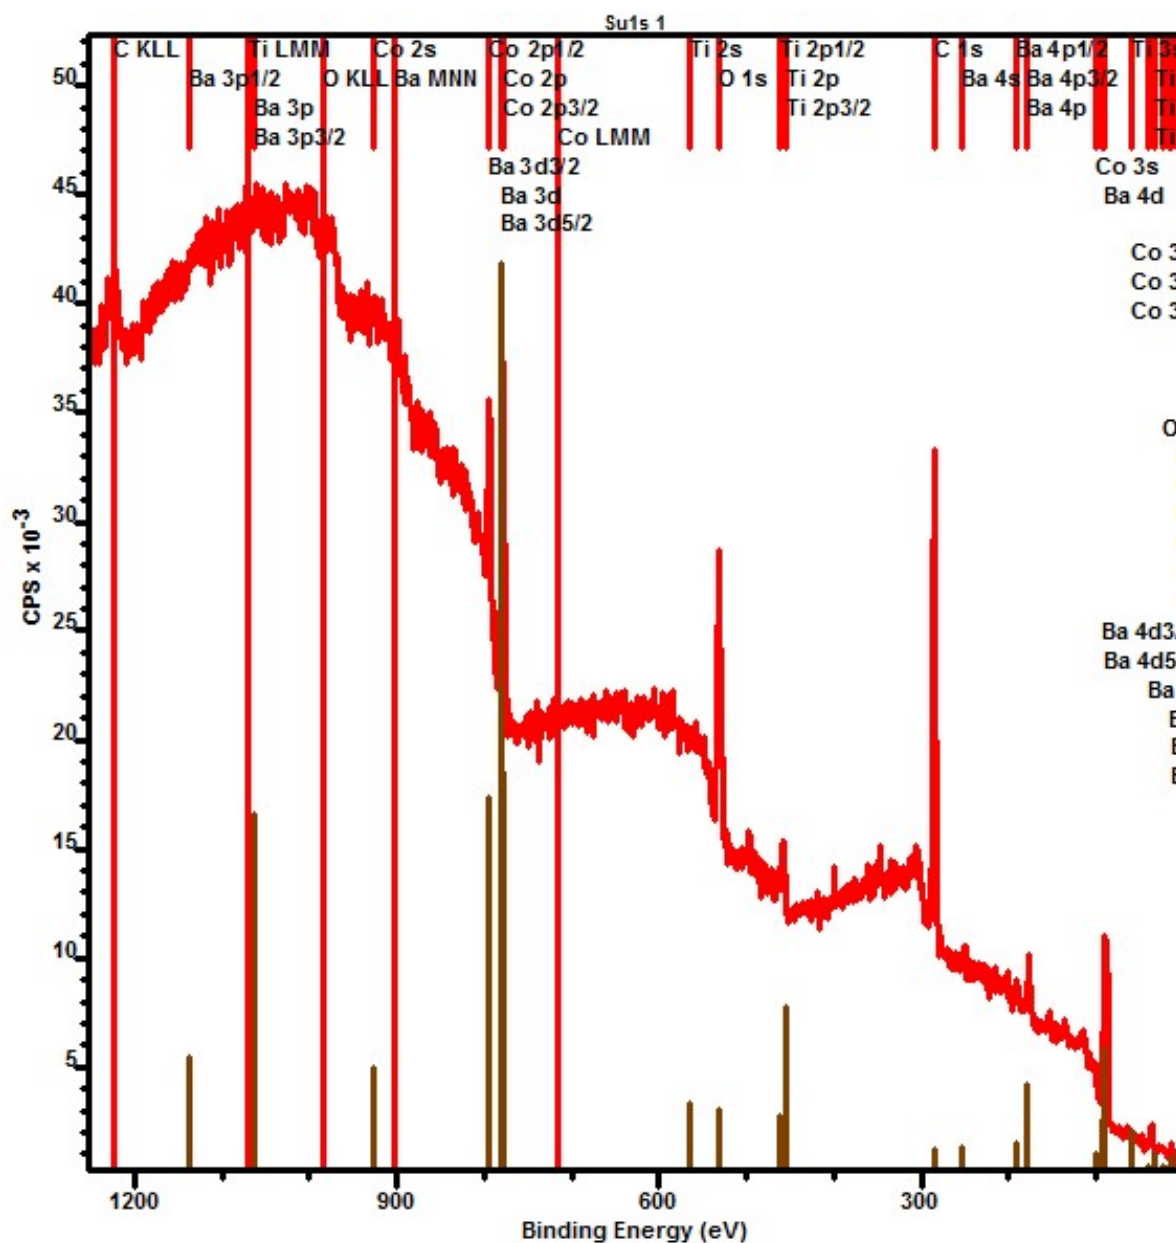

High-resolution X-ray photoelectron spectroscopy (XPS) measurements were carried out to explore the oxidation state of Co and to confirm the presence of all the elements in the BTCO samples. The survey spectrum indicates the the presence of all elements in Co doped BaTiO<sub>3</sub>

samples and their binding energies match well with standard values.

**Supplementary material S2:** Scanning electron micrographs and EDS elemental mapping of  $\text{BTCO}_3$  in a large area of  $30 \times 20 \mu\text{m}$ .

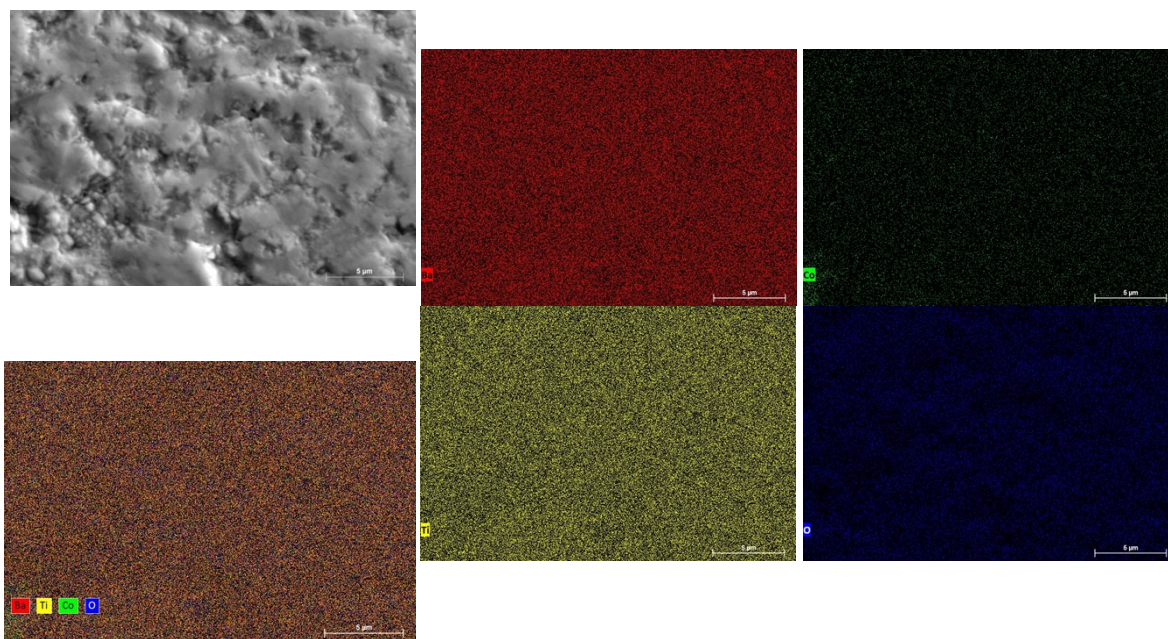

**Supplementary material S3:** Scanning electron micrographs and EDS elemental mapping of BTCO5 in a large area of  $30 \times 20 \mu\text{m}$ .

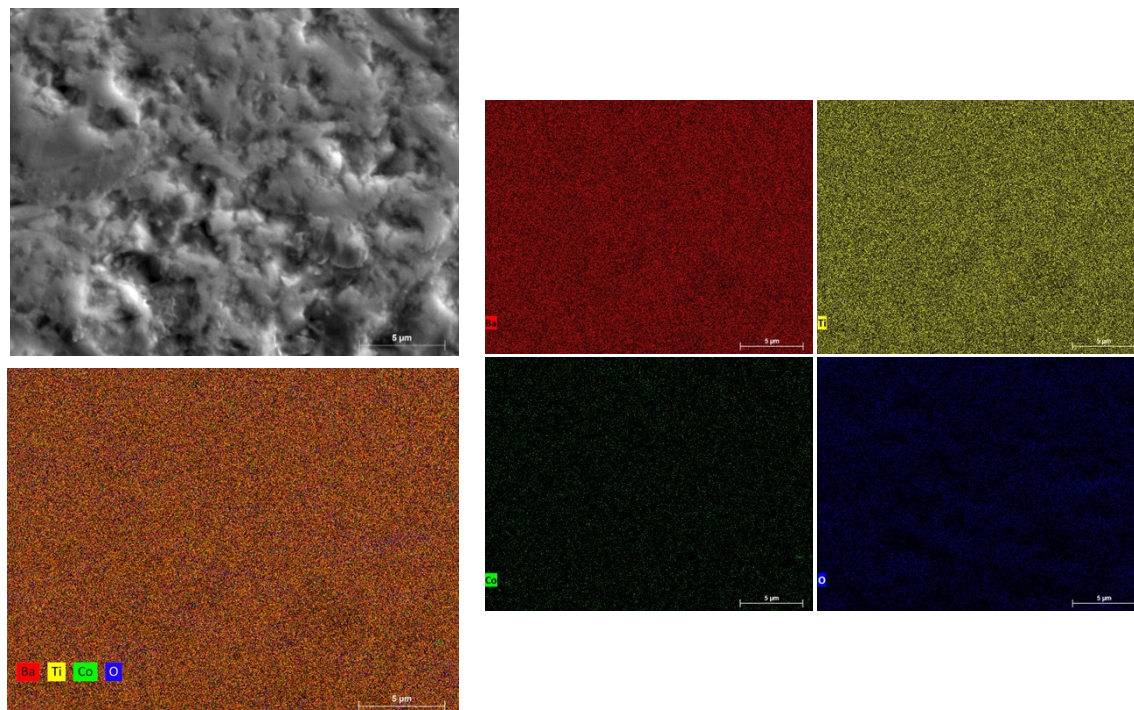

#### Supplementary material S4: EDS spectra of BTCO7 sample

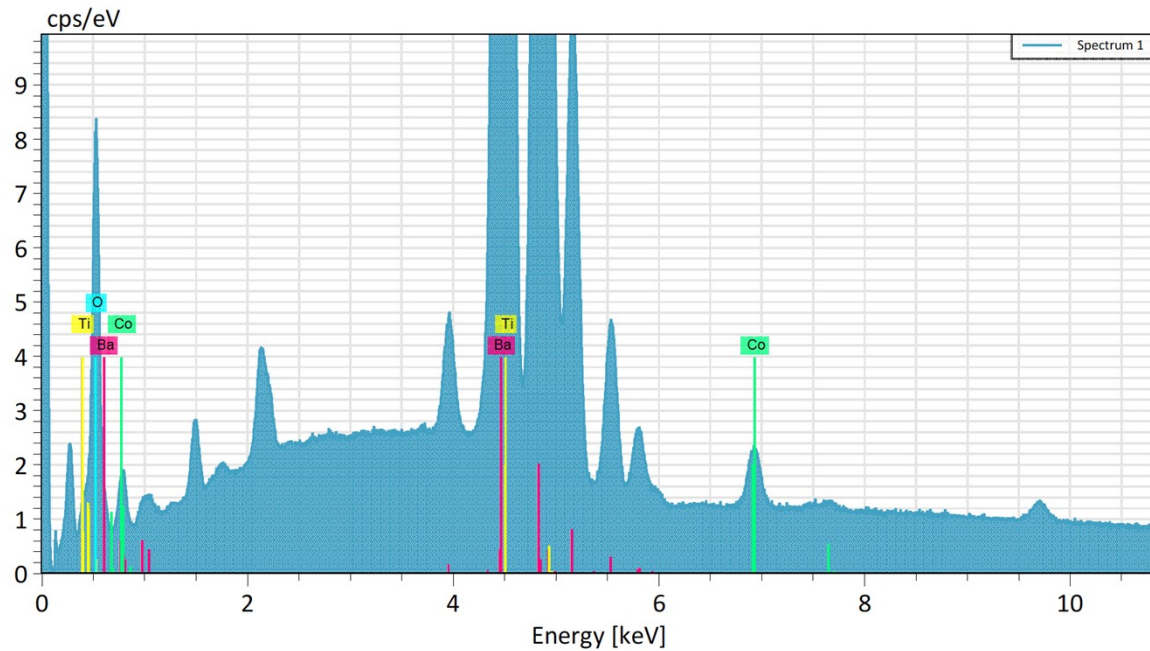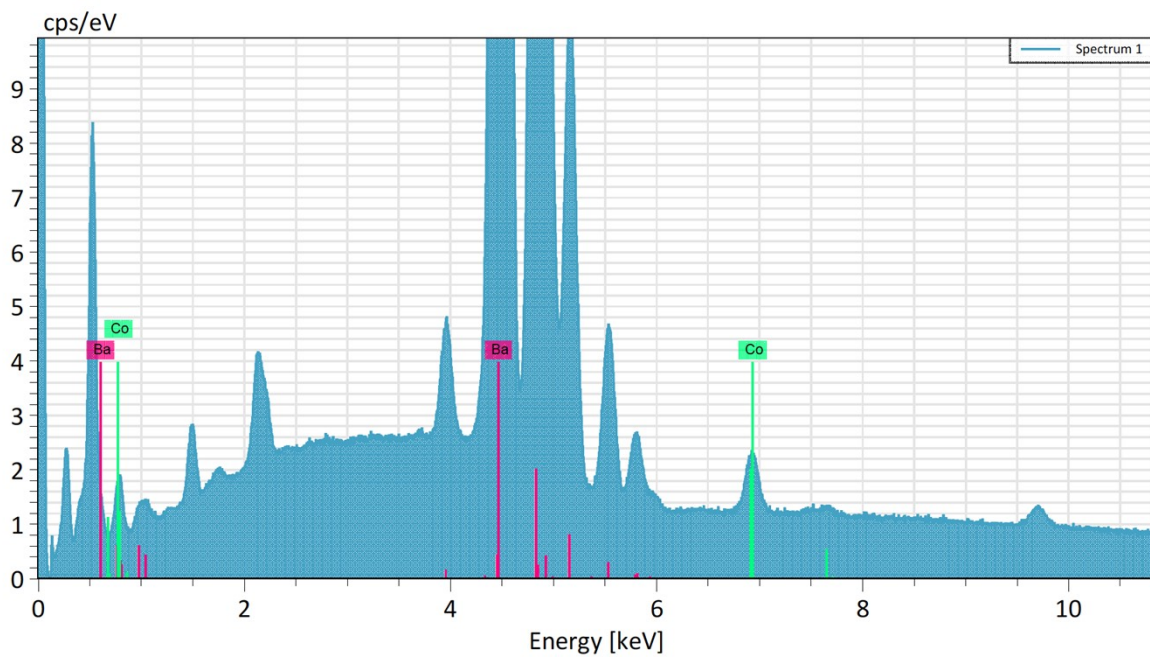

We captured the EDS spectra of all the elements in BTCO7 sample and observed distinct peaks from all the elements even though Co has a low concentration and overlaps with some Ba peaks.
